# Supplementary material for: Integrated molecular pathway analysis informs a synergistic combination therapy targeting PTEN/PI3K and EGFR pathways for basal-like breast cancer
Source: PubMed Central journal article supplement (PMC4971667; doi:10.1186/s12885-016-2609-2), 2016-08-02
Supplement: 12885_2016_2609_MOESM1_ESM.pdf [file 12885_2016_2609_MOESM1_ESM.pdf]

**A****B**

**Supplementary Figure 1** – HCC70 (A) or SUM149 (B) cells were treated with single-agent gefitinib (left) or combination treatment with 5 uM LY294002 plus gefitinib at the concentrations indicated and cell proliferation measured over 4 days.
